# Supplementary material
Source: PubMed Central journal article supplement (PMC3581145)
Supplement: NIHMS434931-supplement-Supplementary_Figure_Legends.pdf [file NIHMS434931-supplement-Supplementary_Figure_Legends.pdf]

**Supplementary Figure Legends**

**Suppl. Fig. 1. IL-28 and IL-29 levels in HCV-infected PHH do not correlate with intracellular HCV RNA levels.**

**Suppl. Fig. 2. IL-28 and IL-29 levels in HCV-infected PHH do not correlate with rs12979860, rs809917, rs8103142, rs12980275 and rs11881222 genotypes.**
